# Supplementary material for: ROS-responsive chitosan-SS31 prodrug for AKI therapy via rapid distribution in the kidney and long-term retention in the renal tubule
Source: PubMed Central journal article supplement — Sci Adv. 2020 Oct 9;6(41):eabb7422. doi: 10.1126/sciadv.abb7422 (PMC7546709; doi:10.1126/sciadv.abb7422), 2020-10-09
Supplement: abb7422_SM.pdf [file abb7422_SM.pdf]

## Supplementary Materials for

### **ROS-responsive chitosan-SS31 prodrug for AKI therapy via rapid distribution in the kidney and long-term retention in the renal tubule**

Di Liu, Gaofeng Shu, Feiyang Jin, Jing Qi, Xiaoling Xu, Yan Du, Hui Yu, Jun Wang, Mingchen Sun, Yuchan You, Minxia Zhu, Meixuan Chen, Luwen Zhu, Qiying Shen, Xiaoying Ying, Xuefang Lou\*, Saiping Jiang\*, Yongzhong Du\*

\*Corresponding author. Email: [duyongzhong@zju.edu.cn](mailto:duyongzhong@zju.edu.cn) (Y.D.); [j5145@zju.edu.cn](mailto:j5145@zju.edu.cn) (S.J.); [louxf@zucc.edu.cn](mailto:louxf@zucc.edu.cn) (X.L.)

Published 9 October 2020, *Sci. Adv.* **6**, eabb7422 (2020)  
DOI: 10.1126/sciadv.abb7422

#### **This PDF file includes:**

Figs. S1 to S10

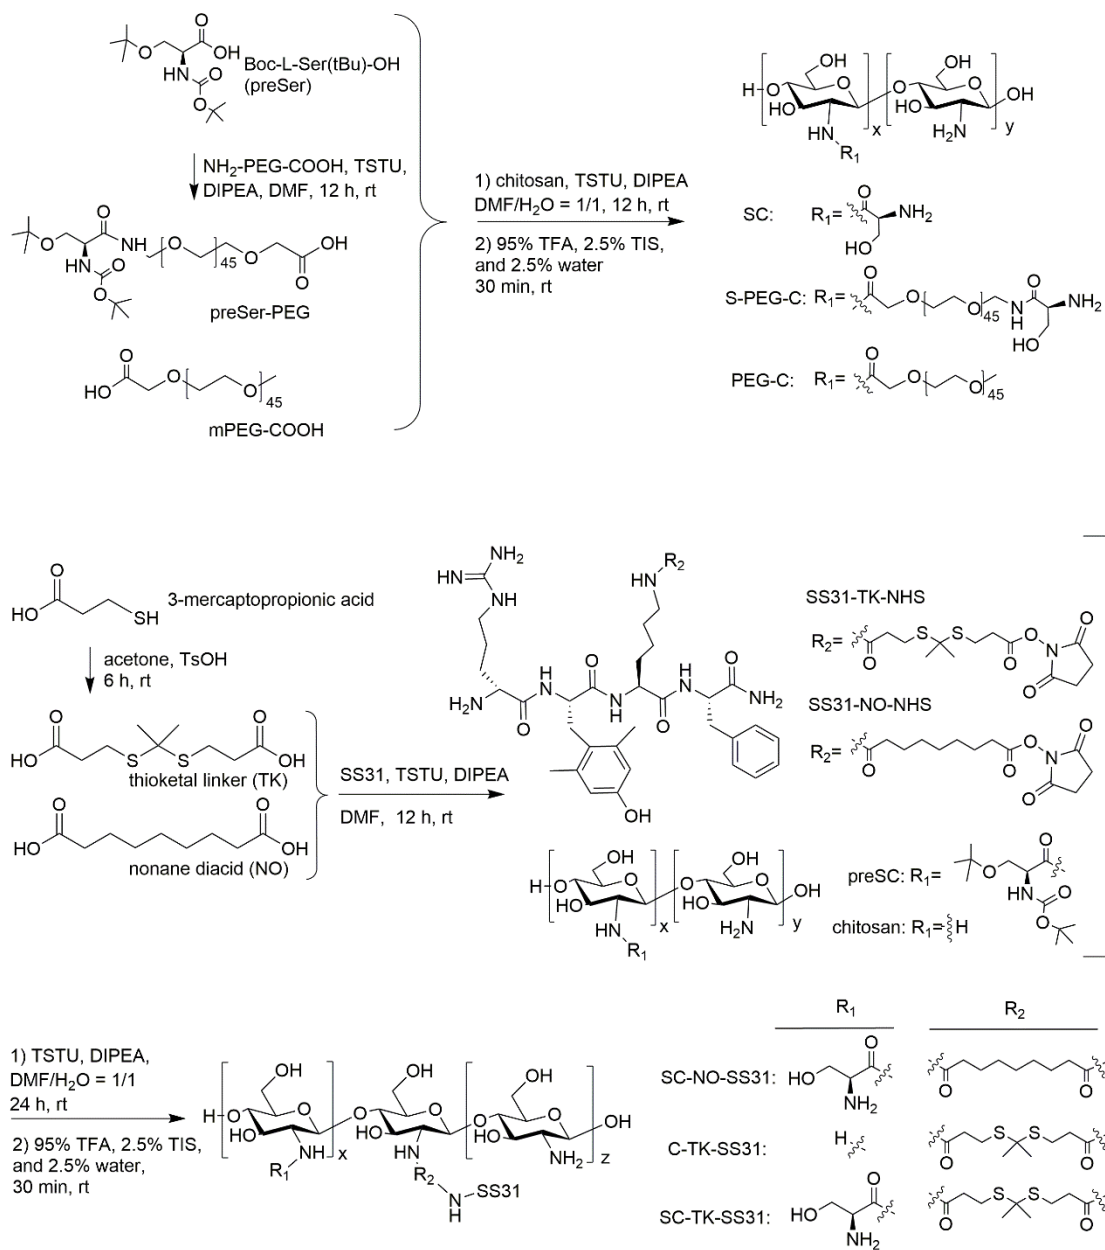

**Fig. S1. Syntheses of SC, S-PEG-C, PEG-C, SC-TK-SS31, C-TK-SS31 and SC-NO-SS31.**

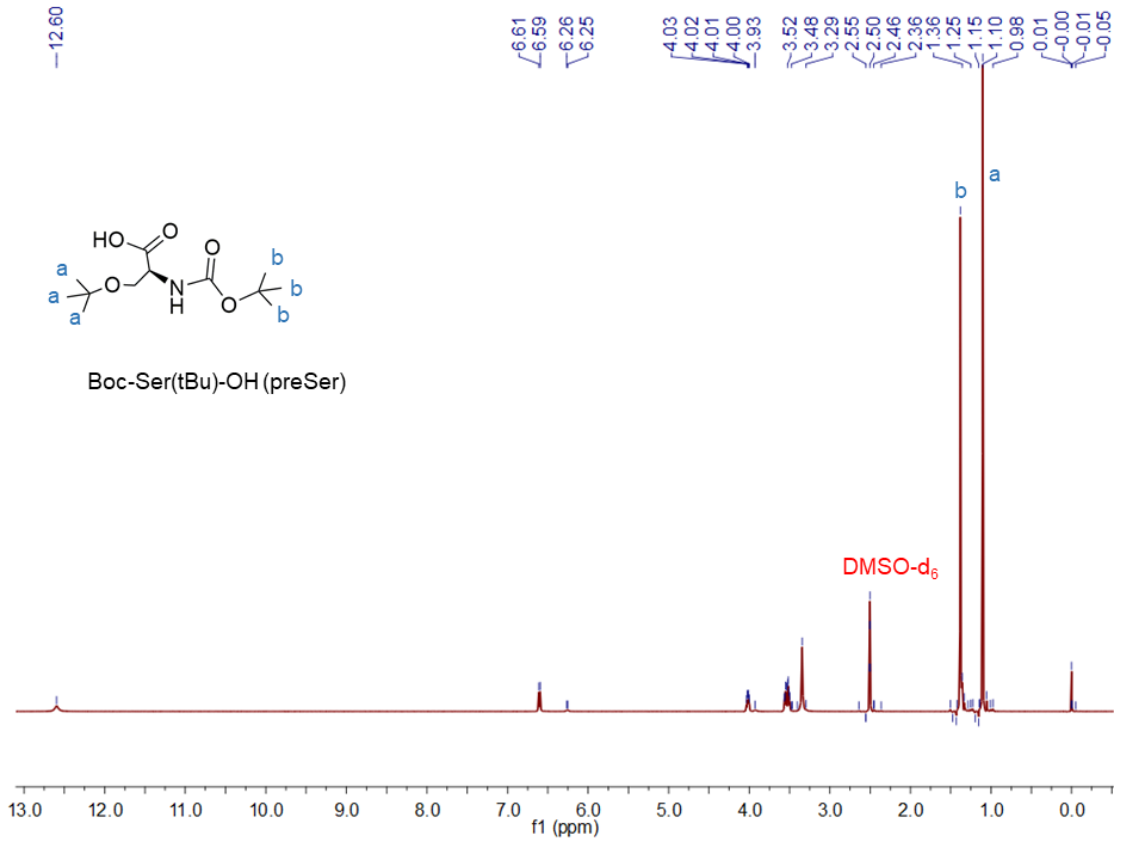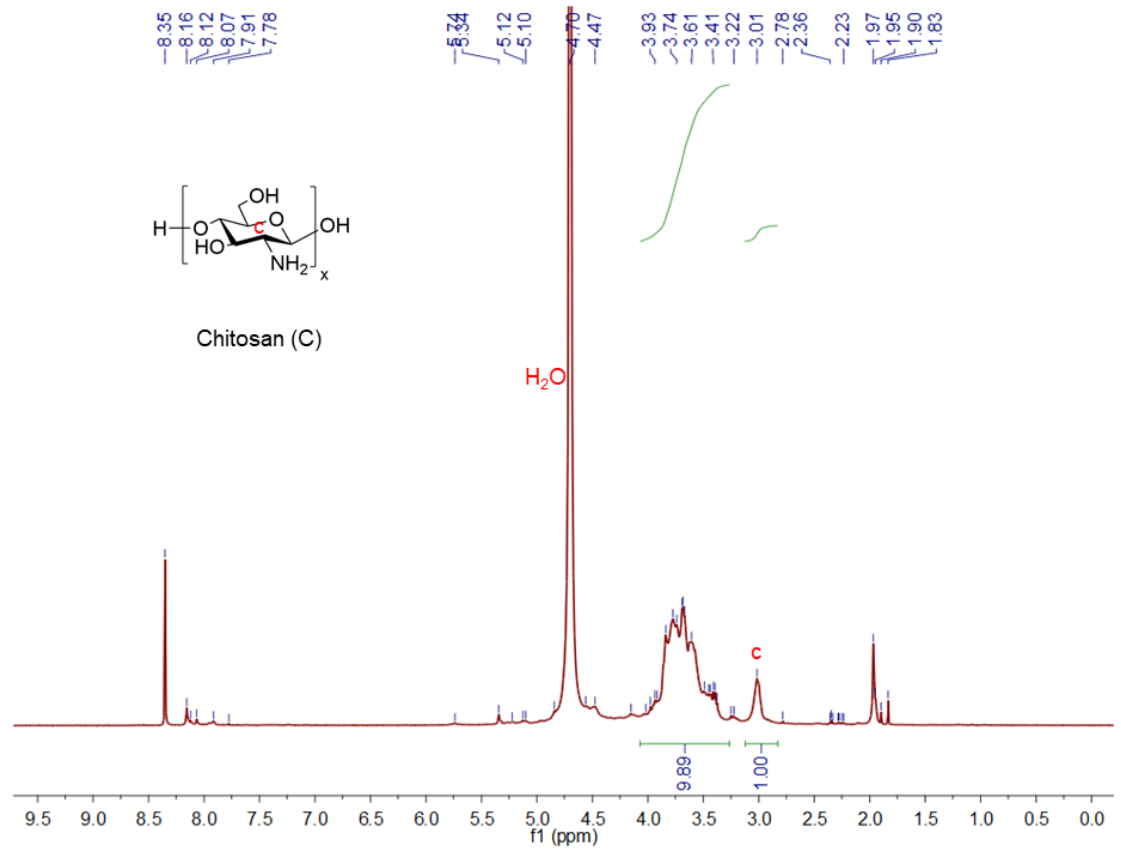

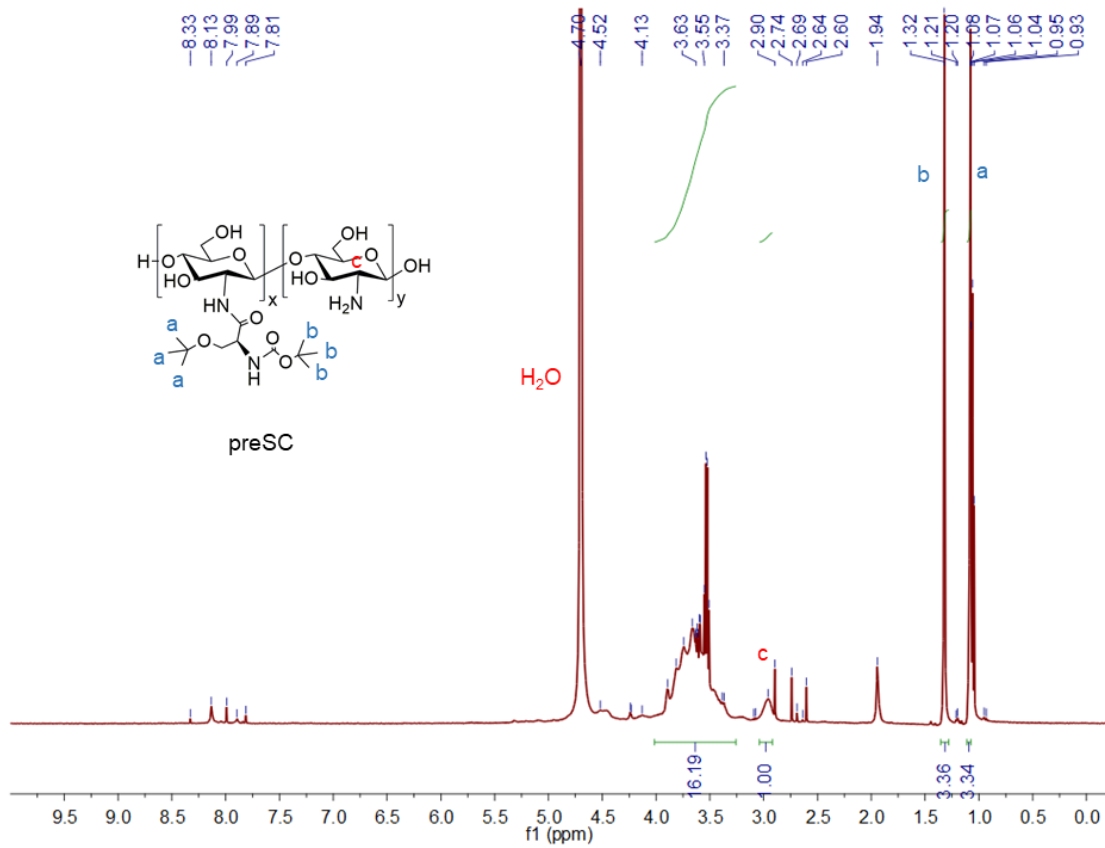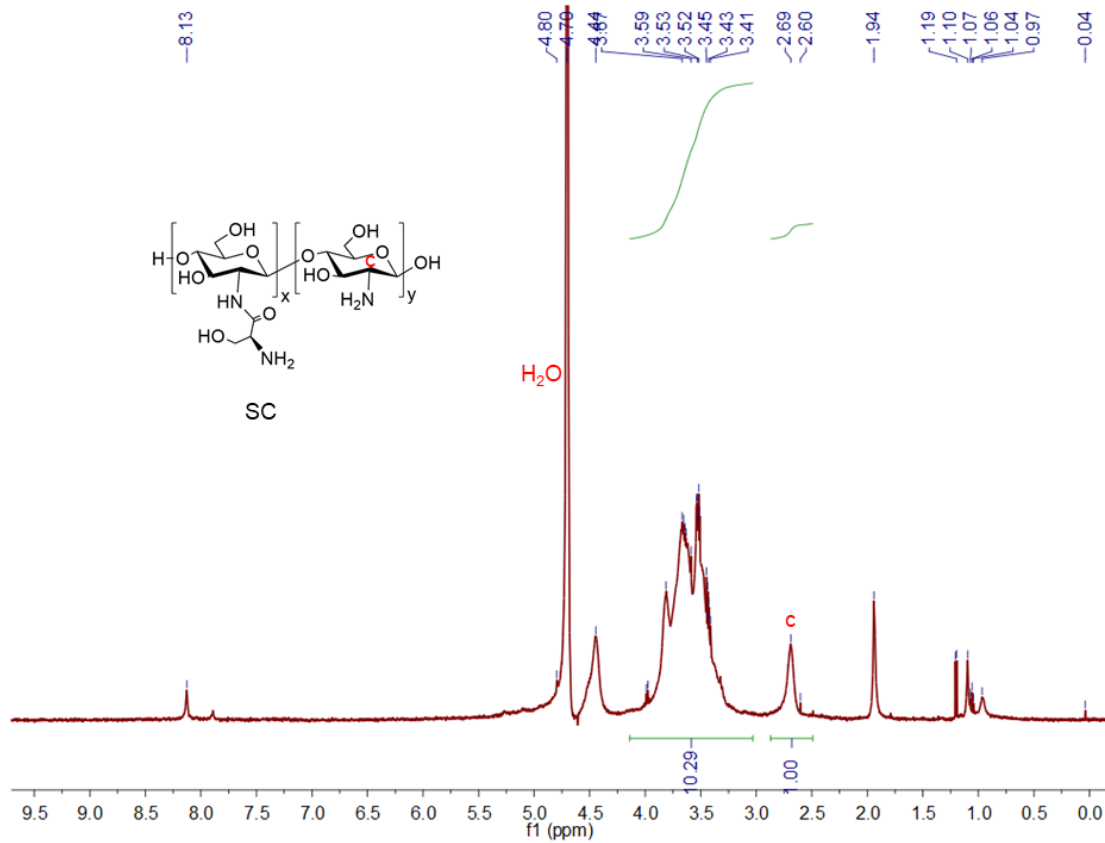

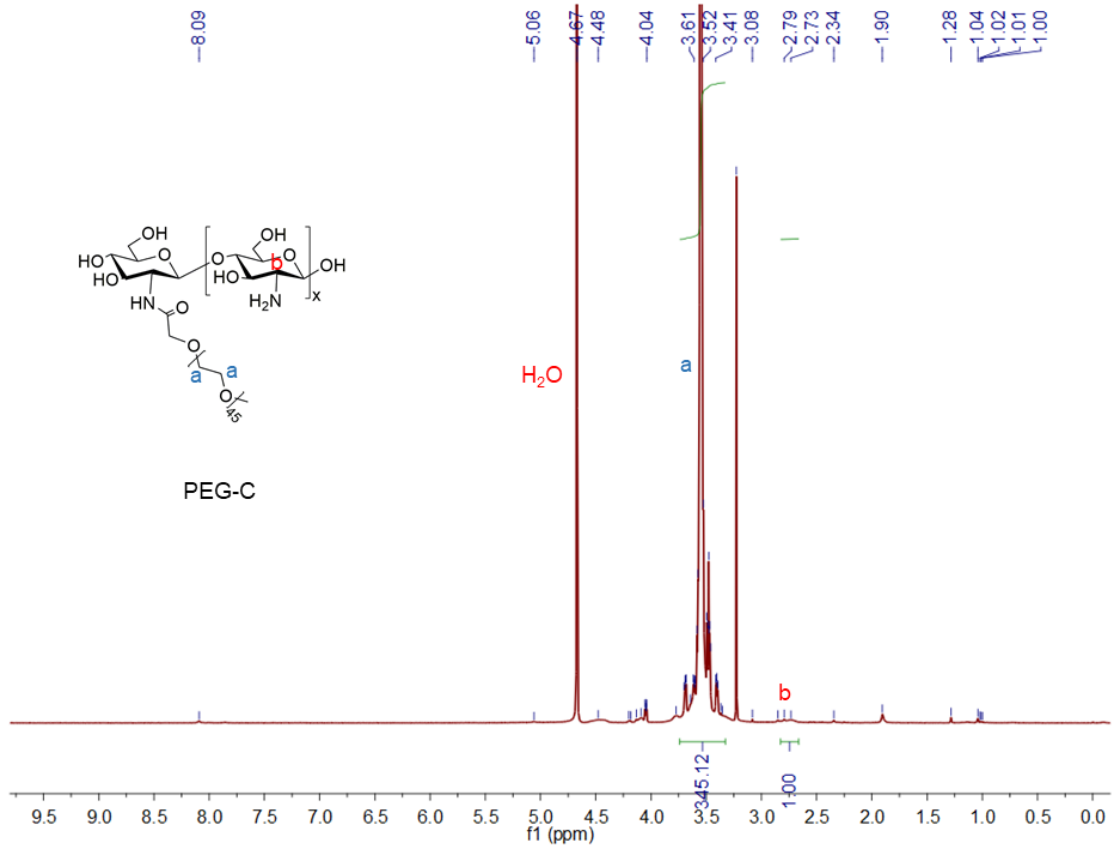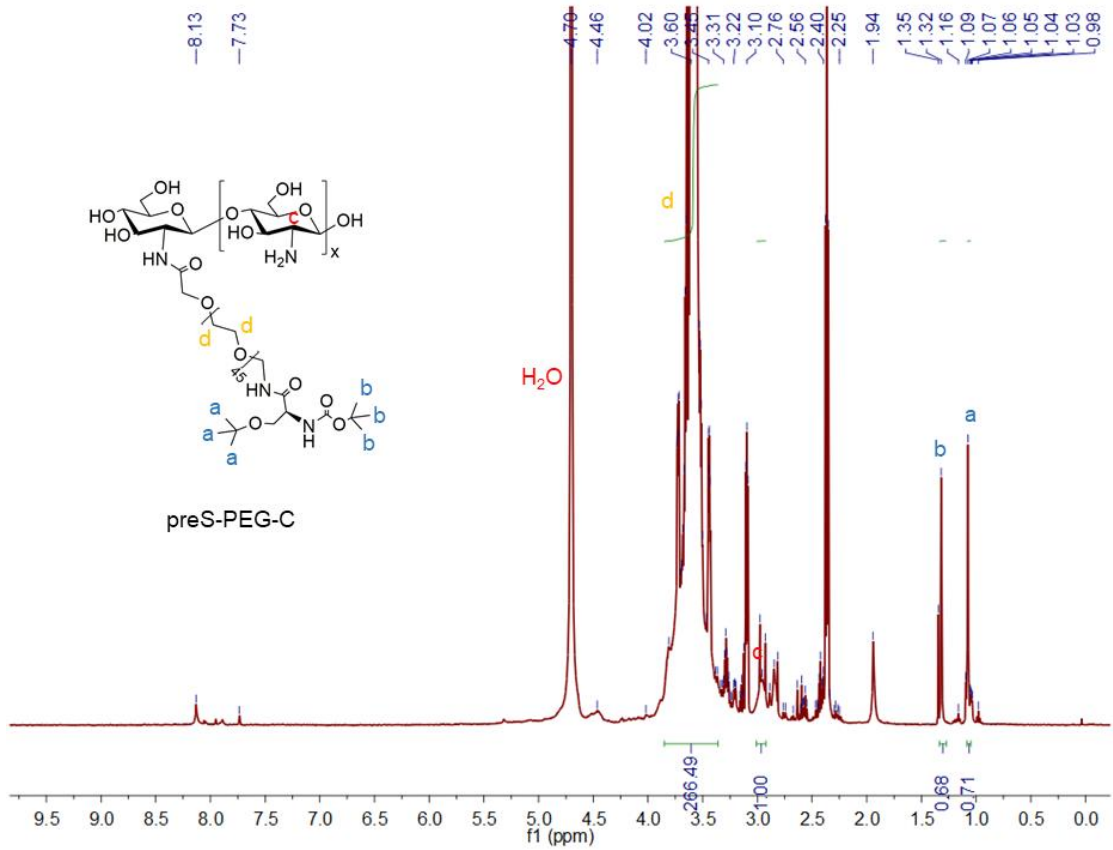

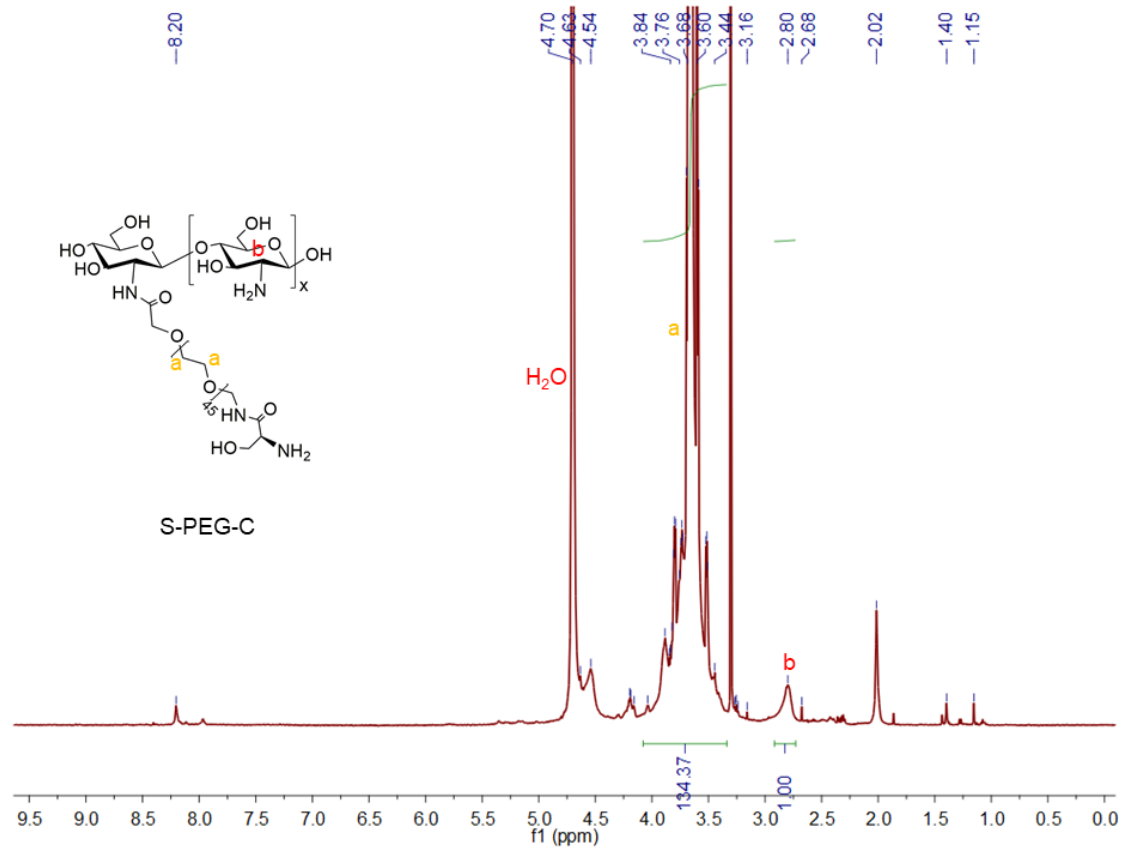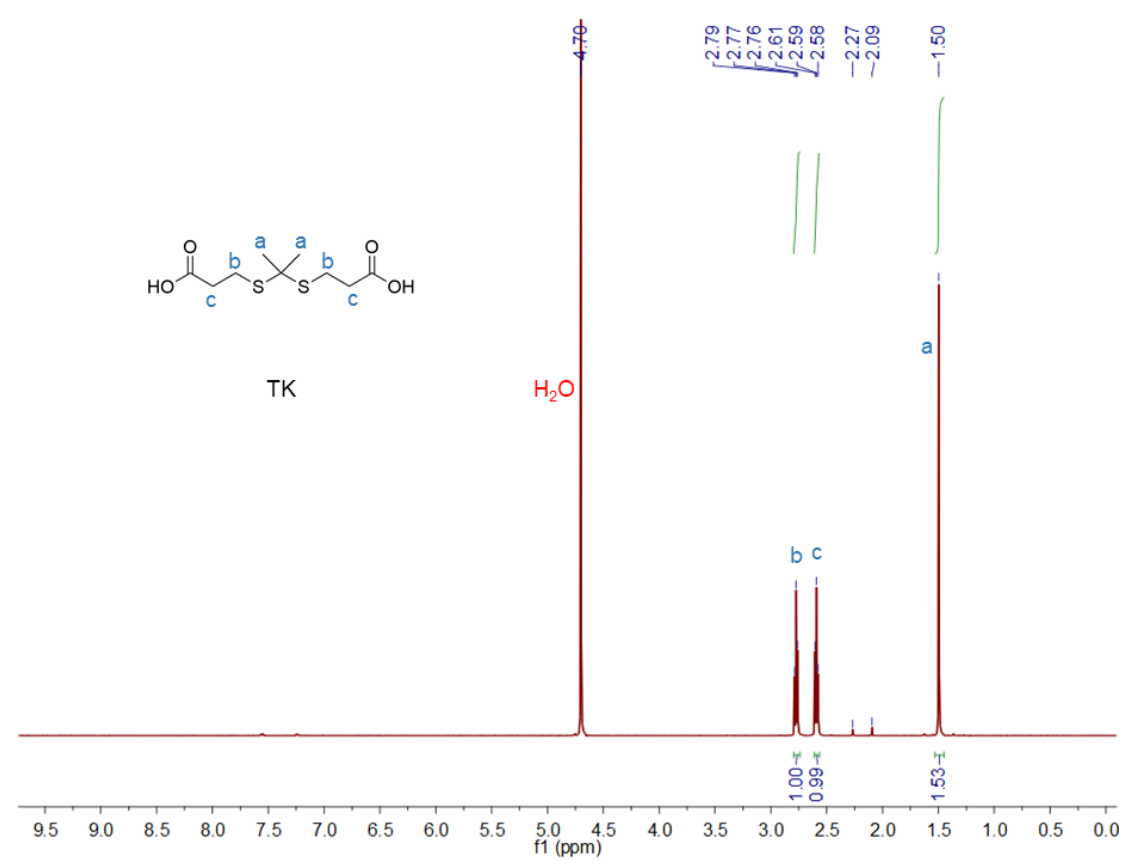

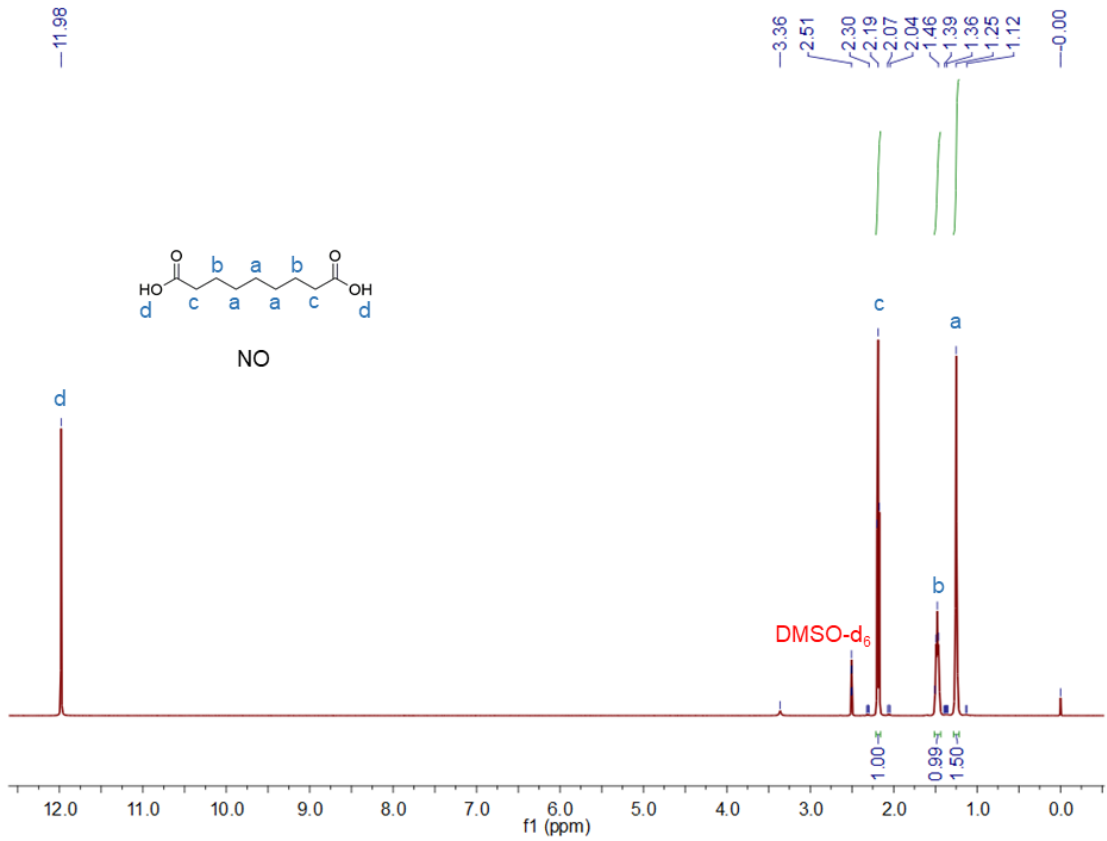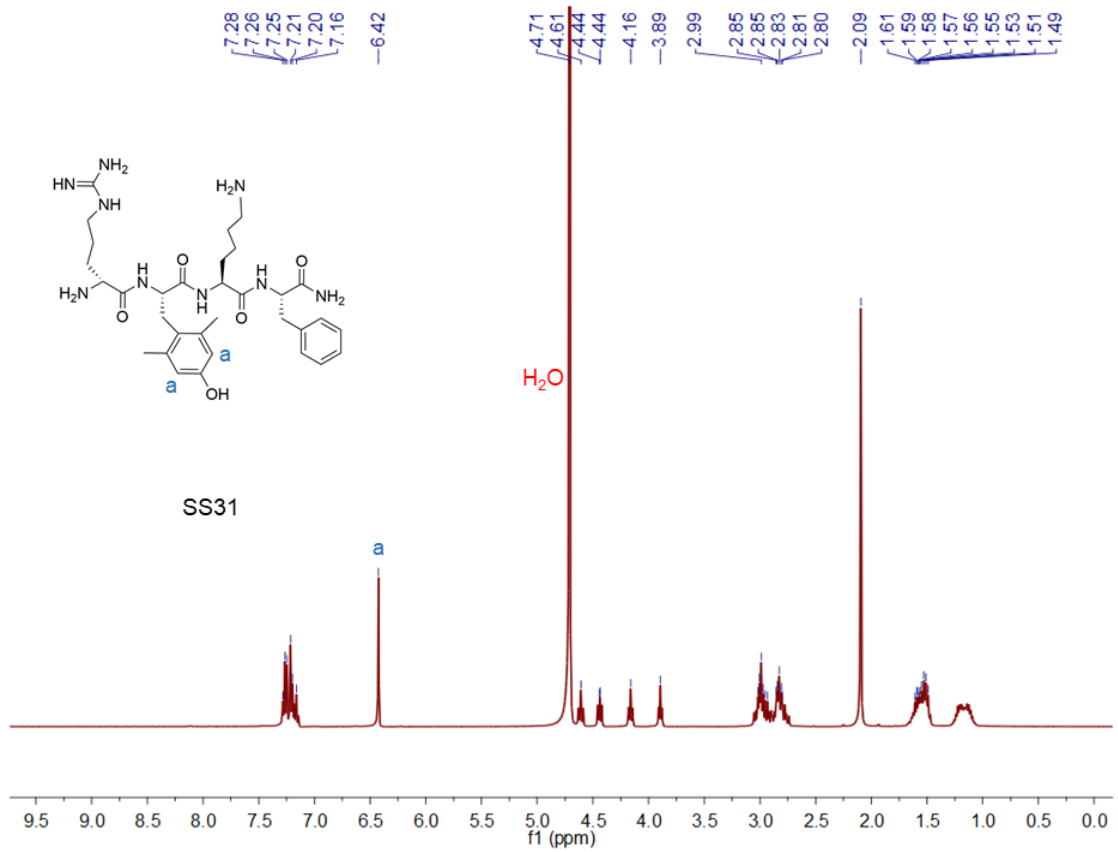

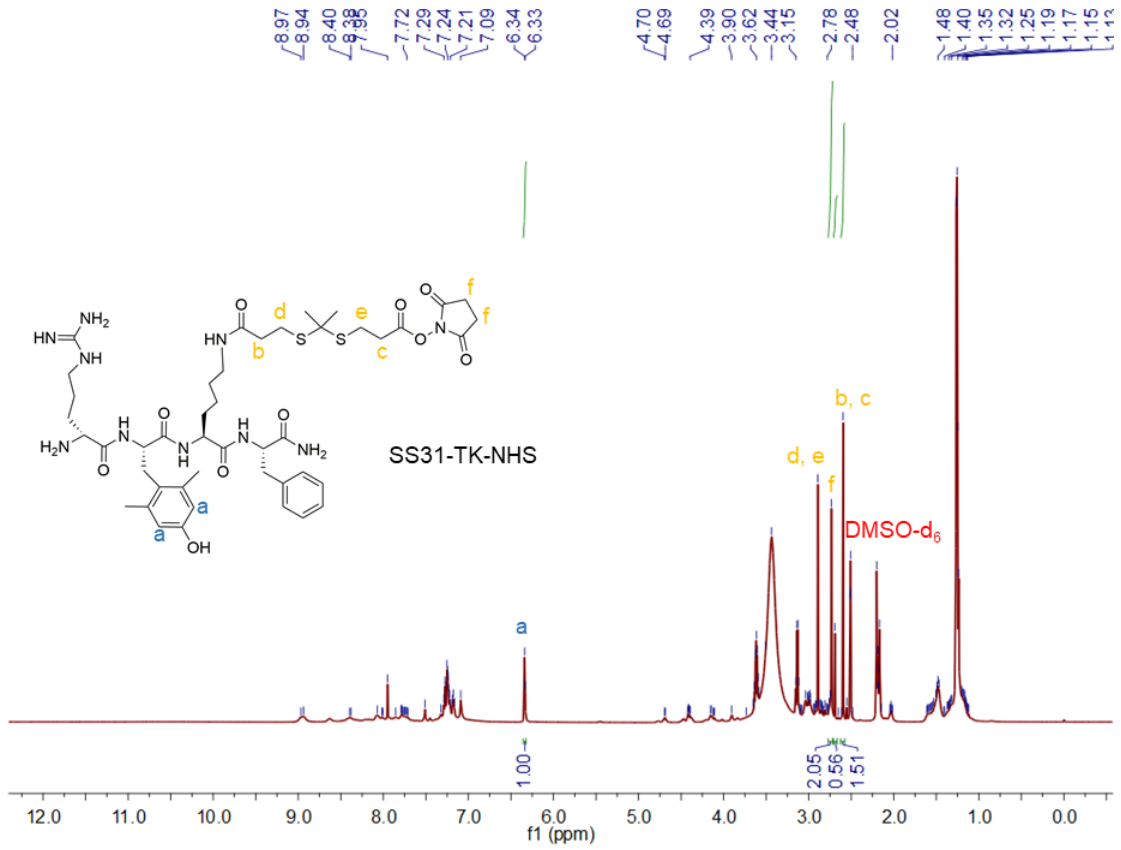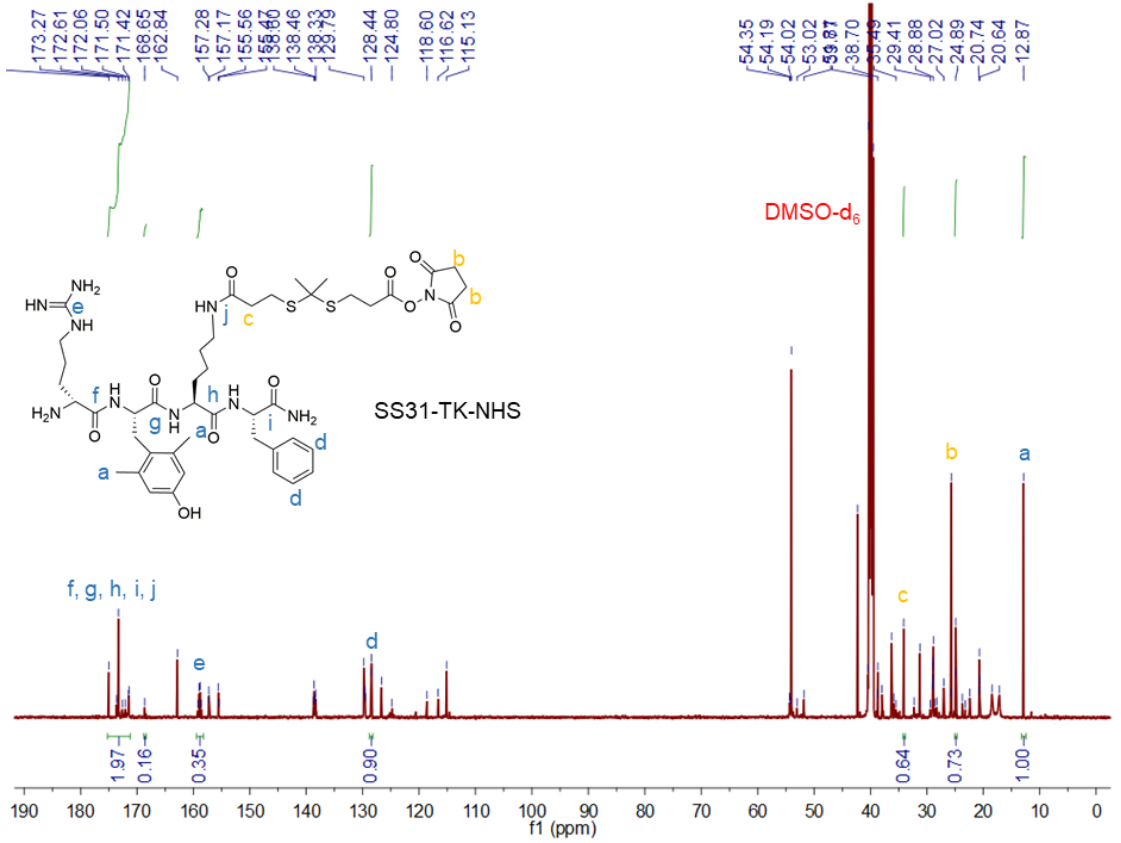



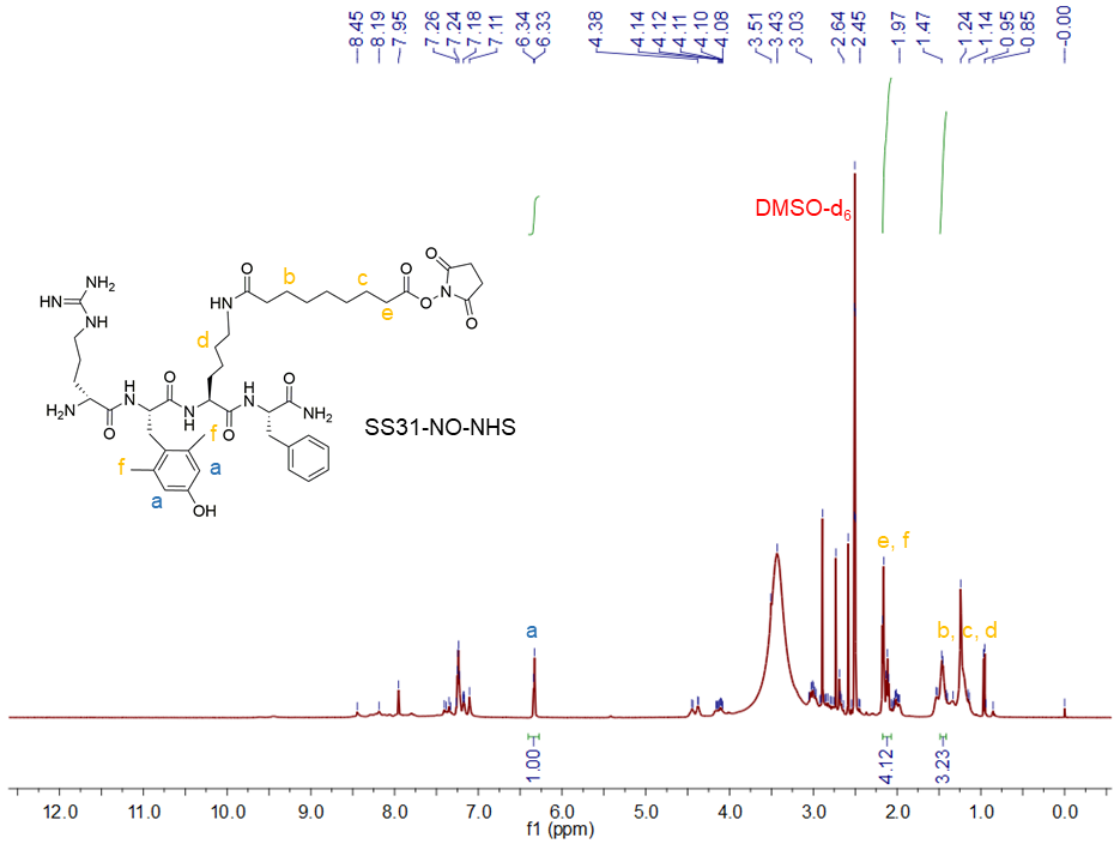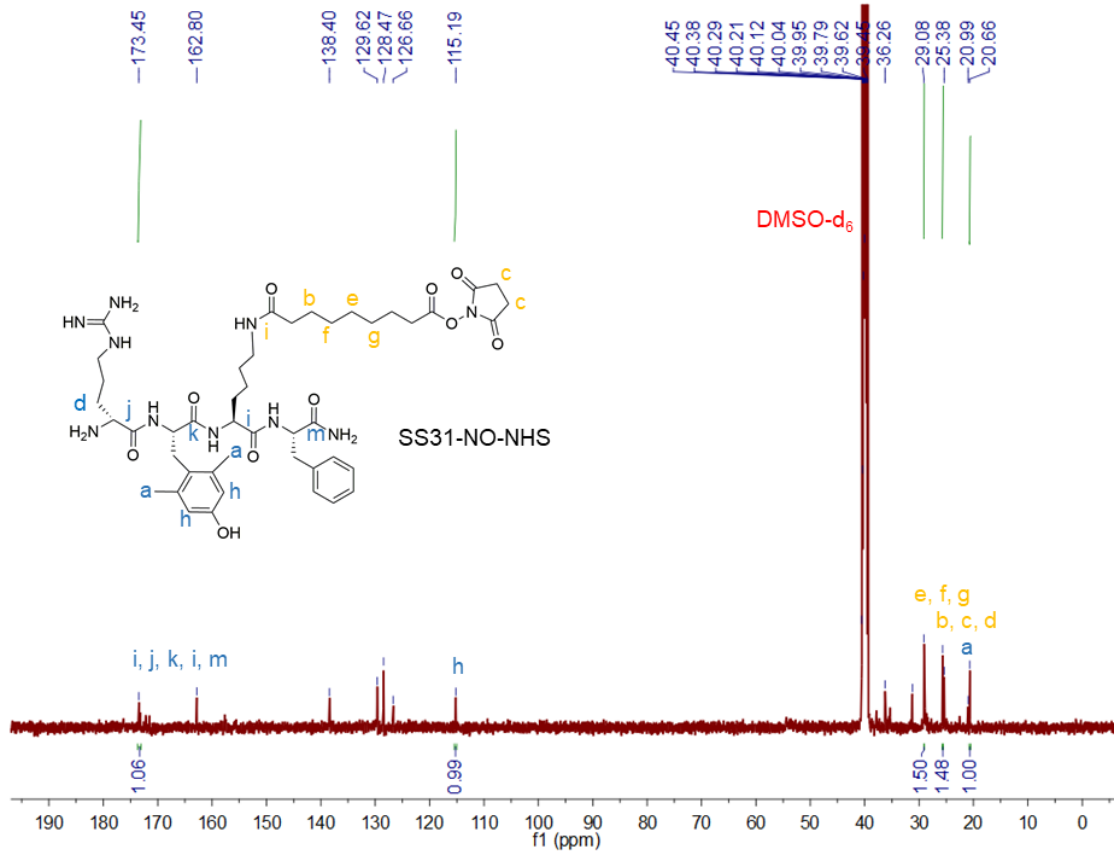

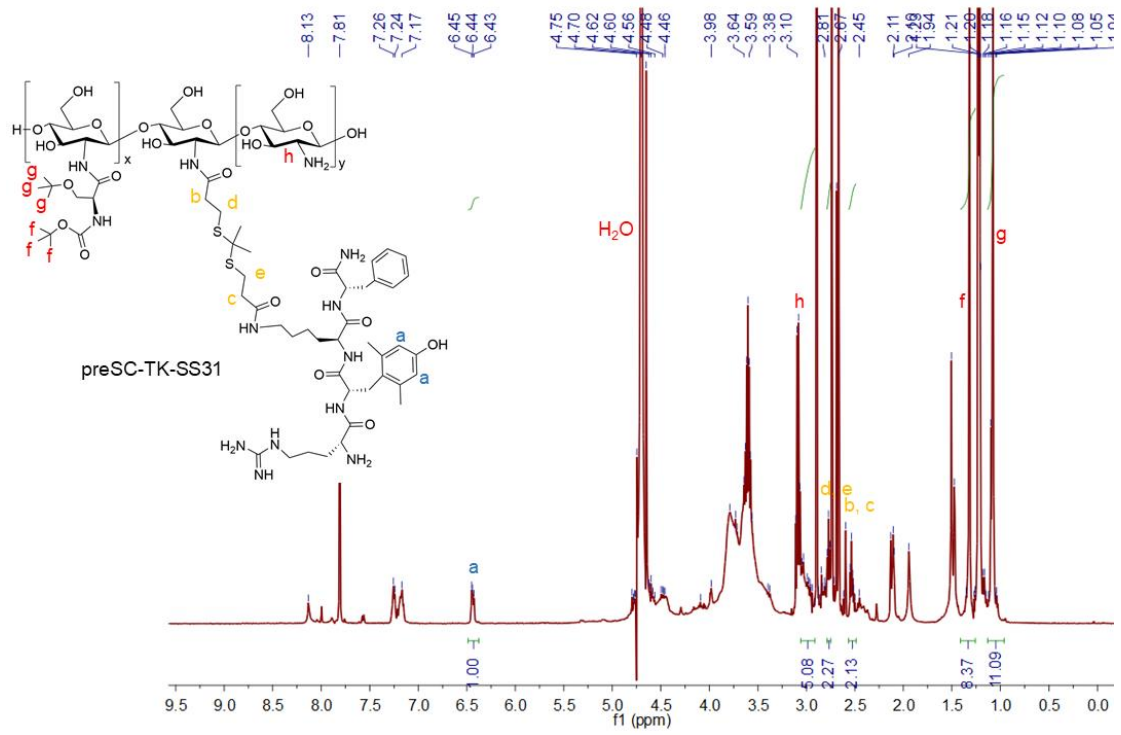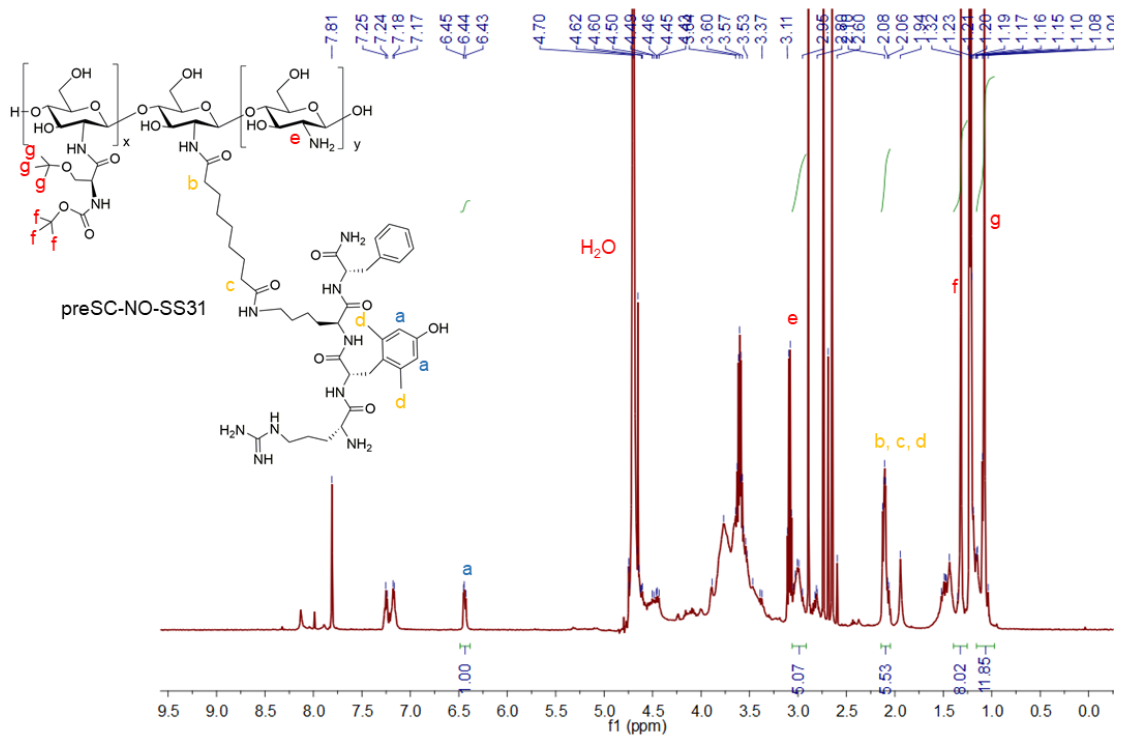

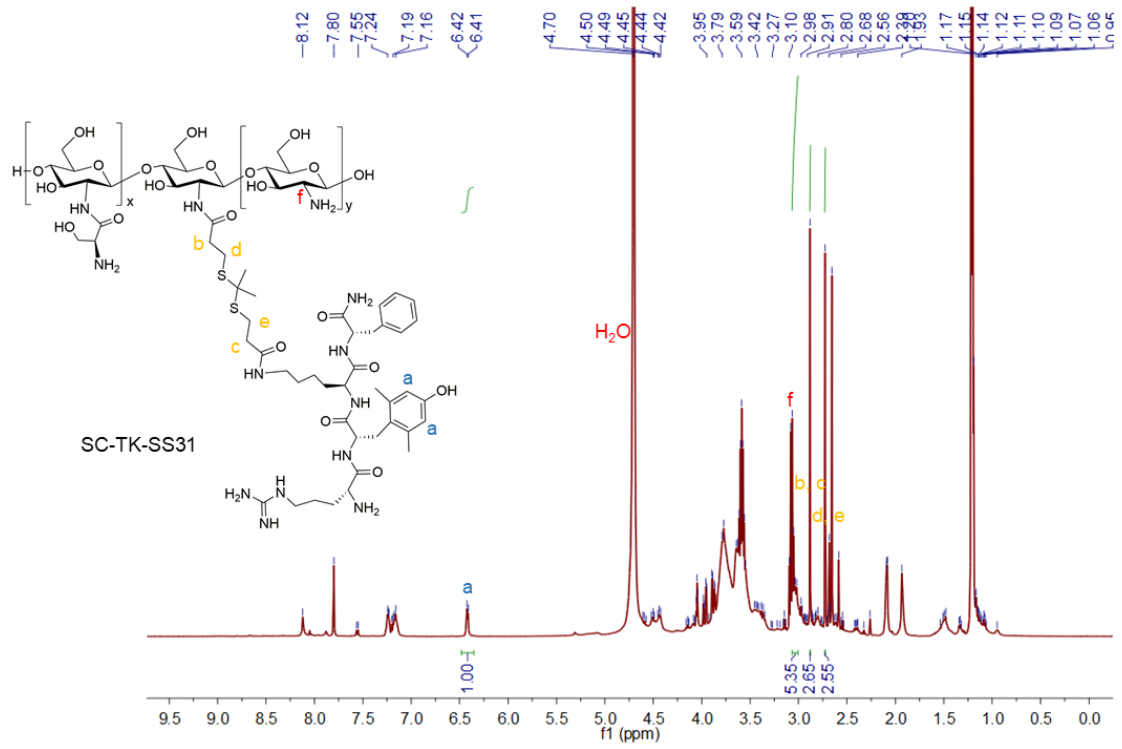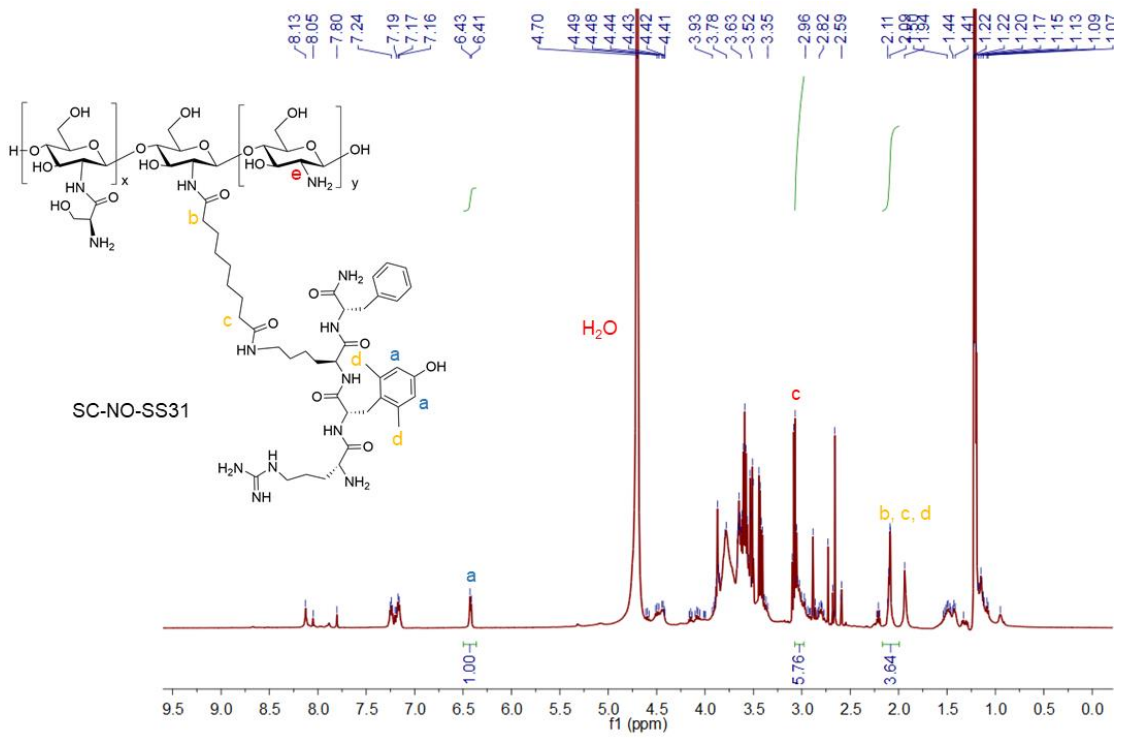

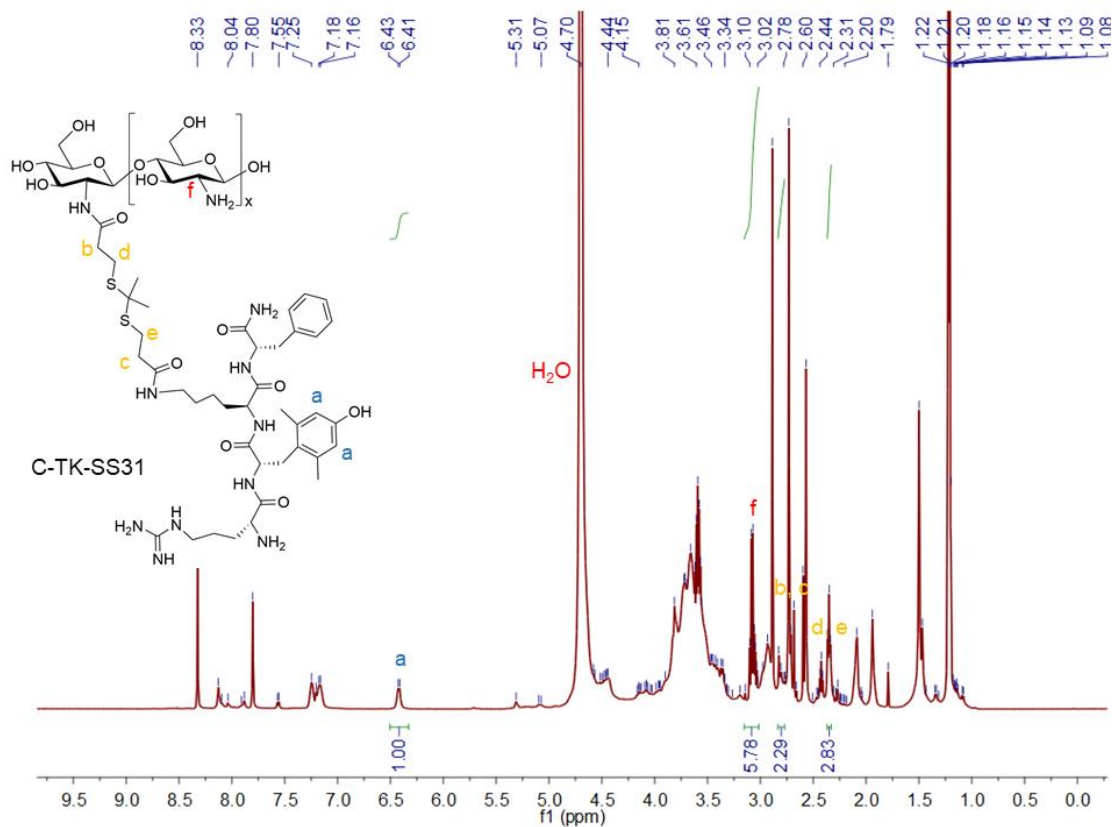

**Fig. S2.** <sup>1</sup>H-NMR spectra of reagents, intermediates and products in Fig. S1.

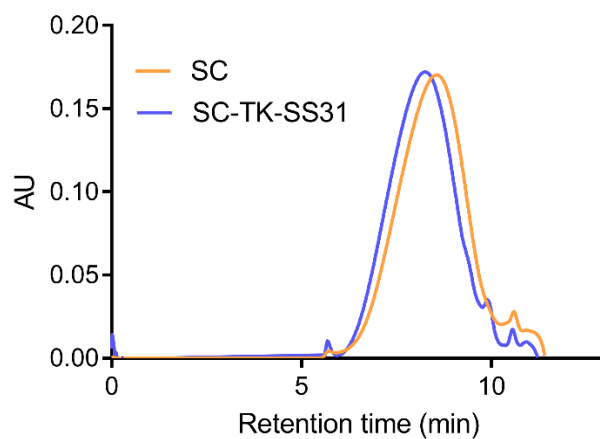

**Fig. S3.** The standard GPC traces of SC and SC-TK-SS31.

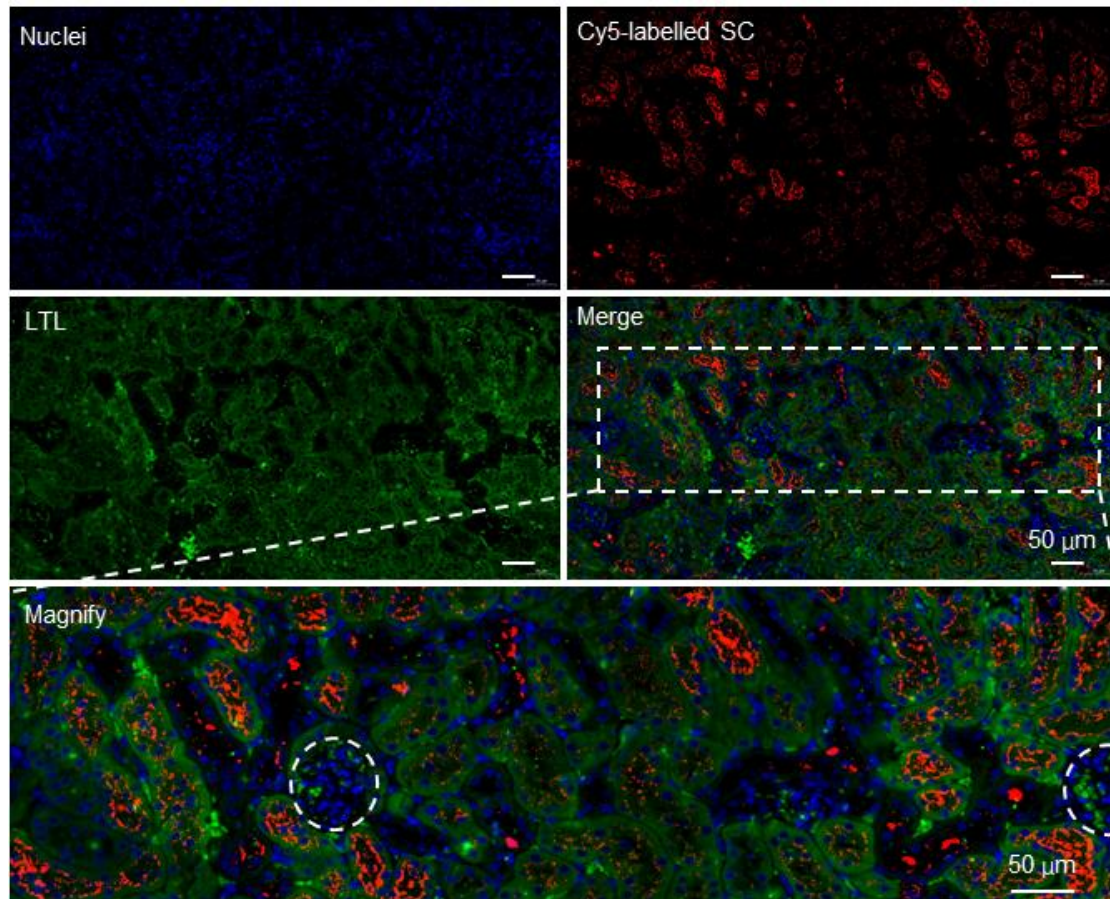

**Fig. S4. SC located in renal tubules.** Representative confocal images of AKI kidney sections after intravenous injection of Cy5-SC (red signal) for 4 h. Blue indicates DAPI staining. Immunostaining for *Lotus-tetragonolobus Lectin* (LTL), the proximal tubule marker, is shown in green. White dashed circles denote glomeruli. Scale bar = 50 μm.

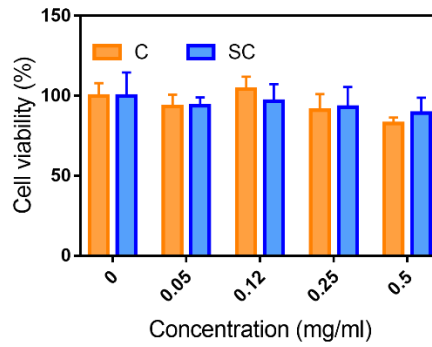

**Fig. S5. *In vitro* biocompatibility of SC.** C indicates chitosan. The data are the mean  $\pm$  s.d. n = 6.

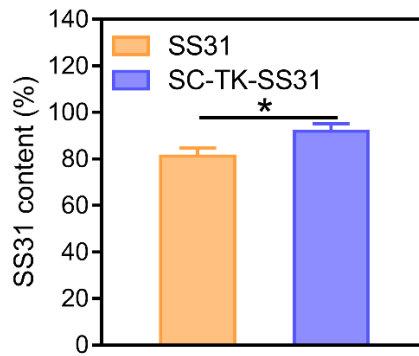

**Fig. S6. Plasma stability of SS31 and SC-TK-SS31.** The remaining SS31 content in plasmas after incubating with SS31 or SC-TK-SS31 at a concentration of 10  $\mu$ g/ml SS31 in a 37 °C incubator for 24 h. The data are the mean  $\pm$  s.d. n = 3, \* p < 0.05 between groups as indicated.

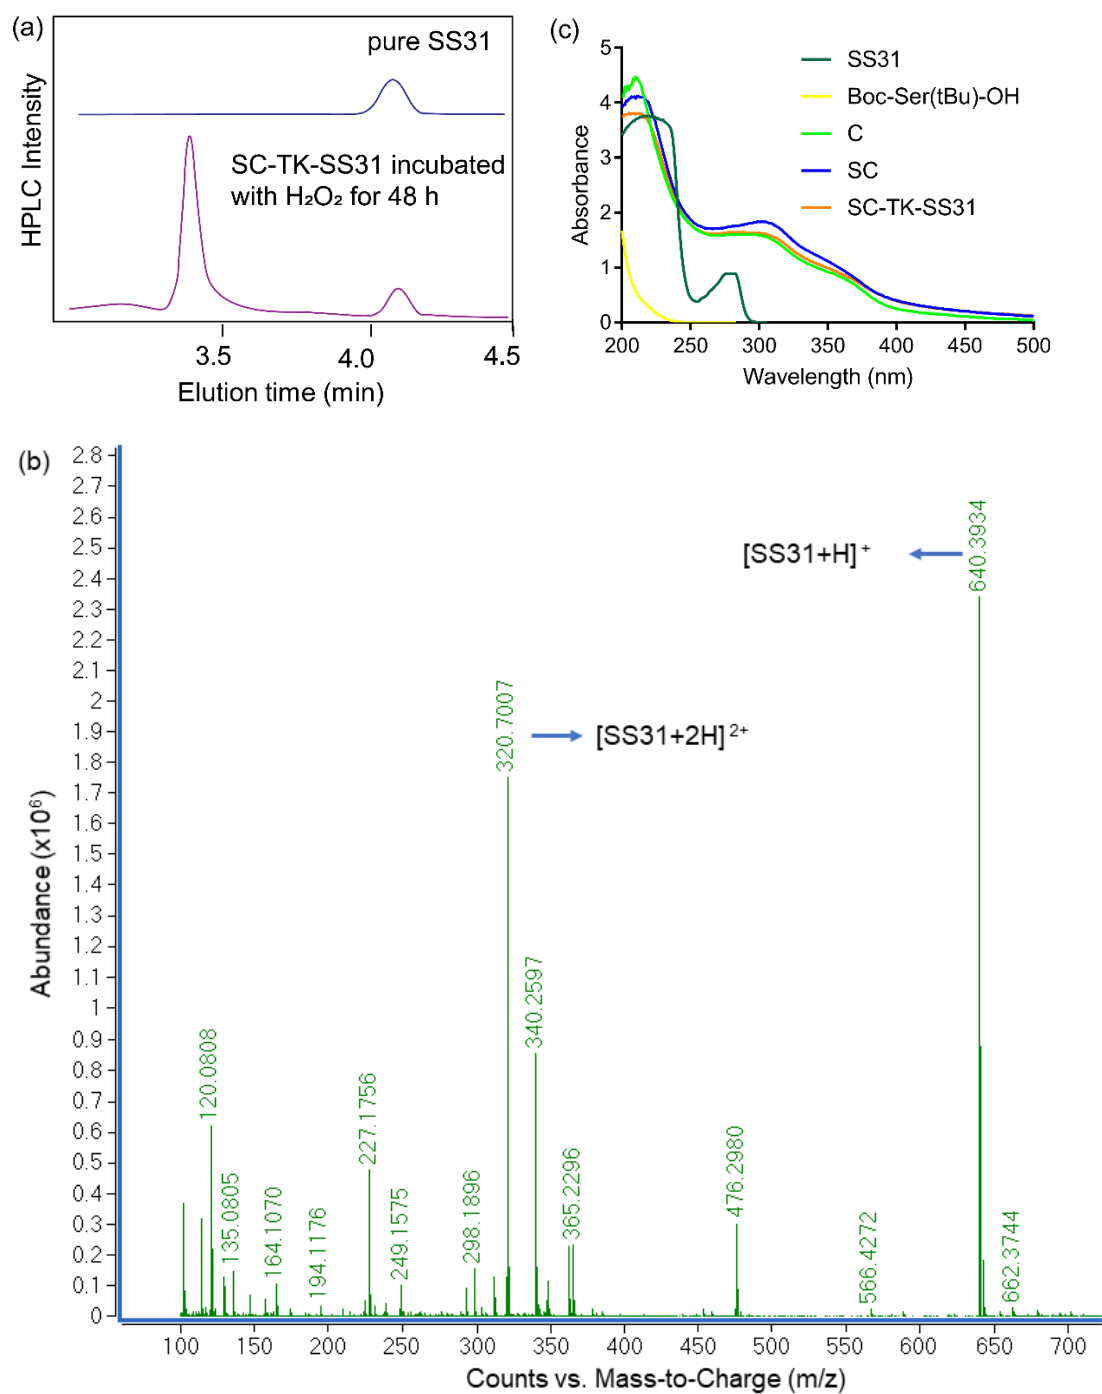

**Fig. S7. Pure SS31 release of SC-TK-SS31 triggered by  $H_2O_2$ .** (a) HPLC trace of pure SS31 (elution time, 4.1 min) and SC-TK-SS31 incubated with  $H_2O_2$  (10 mM) for 48 h. (b) LC-MS spectrum of the component of SC-TK-SS31 with an elution time of 4.1 min after 48 h treatment in the presence of 10 mM  $H_2O_2$ . Molecular weight of SS31 is 639.3875 g/mol. (c) UV-Vis absorbance spectra of different contents of SC-TK-SS31.



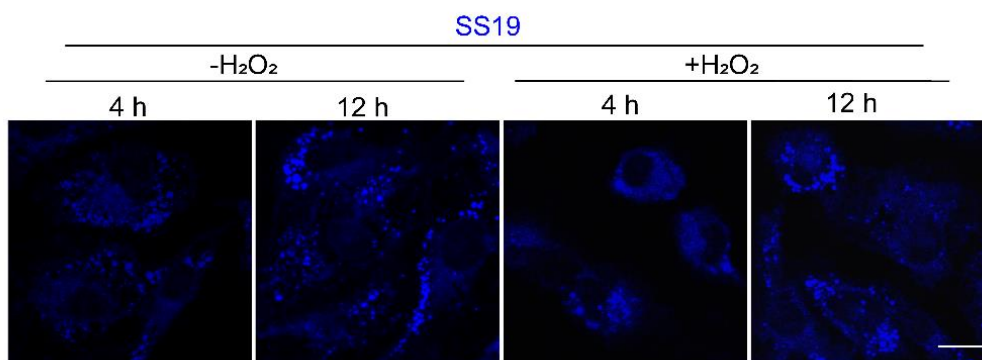

**Fig. S8. Cellular uptake of pure SS31.** Representative confocal images of normal or H<sub>2</sub>O<sub>2</sub>-stimulated HK-2 cells after incubated with SS19 for 4 h or 12 h at a concentration of 20 µg/mL. Blue indicates SS19, representing SS31. Scale bar = 20 µm.

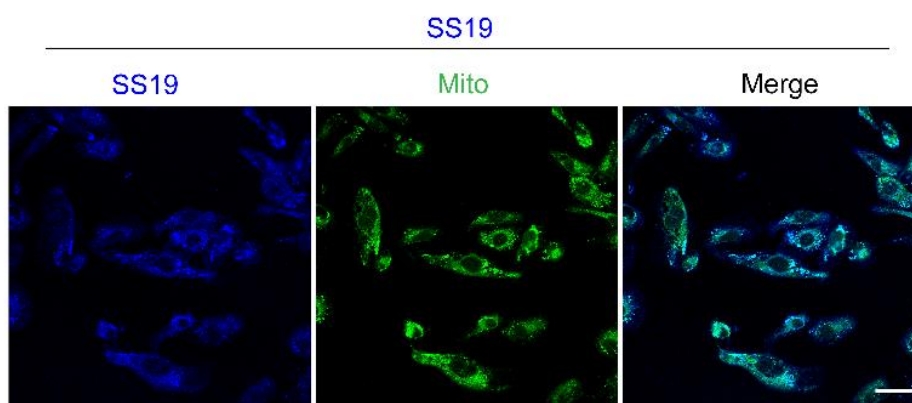

**Fig. S9. Mitochondria targeting ability of pure SS31.** Representative confocal images of H<sub>2</sub>O<sub>2</sub>-stimulated HK-2 cells after incubated with SS19 for 12 h. Blue indicates SS19, representing SS31. MitoTracker-stained mitochondria are shown in green. Scale bar = 40 µm.



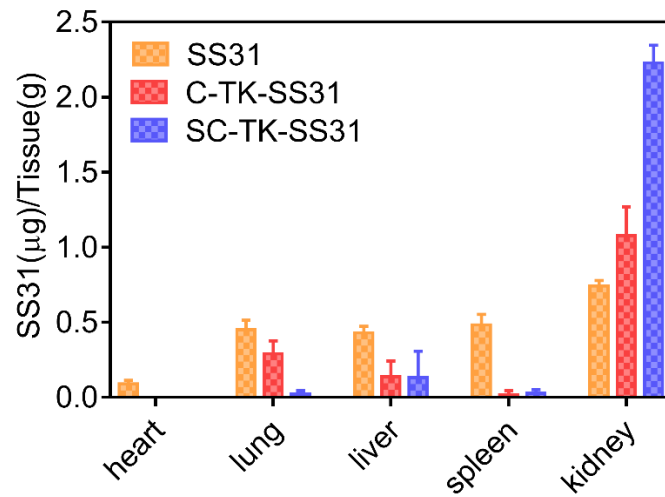

**Fig. S10. SS31 concentrations in the main organs.** SS31 concentrations in heart, lung, liver, spleen, and kidney of AKI mice at 4 h post injection of formulations (pure SS31, C-TK-SS31 and SC-TK-SS31) at a dose of 2 mg/kg SS31. The data are the mean  $\pm$  s.d. n = 3 independent mice.
